# Supplementary material for: An Experimental Performance Study of a Catalytic Membrane Reactor for Ethanol Steam Reforming over a Metal Honeycomb Catalyst
Source: MDPI journal article supplement (doi:10.3390/membranes11100790), 2021-10-18
Supplement: s1 [file s1]

# An experimental performance study of a catalytic membrane reactor for ethanol steam reforming over a metal honeycomb catalyst

Nikita Ereemeev, Alexey Krasnov, Yuliya Bespalko, Ludmilla Bobrova, Oleg Smorygo and Vladislav Sadykov

## Supplementary materials

$S/E = 6$

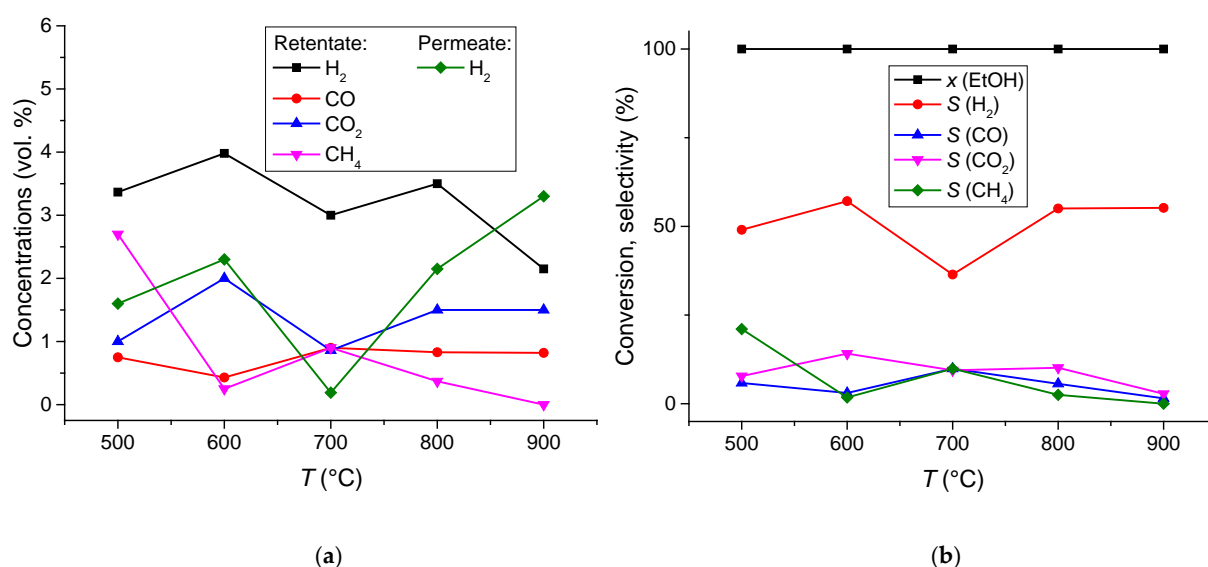

**Figure S1.** Dependencies of ethanol steam reforming products concentrations (a), ethanol conversion and product selectivities (b) on temperature. Steam to ethanol ratio 6, ethanol inlet concentration 3 vol. %.

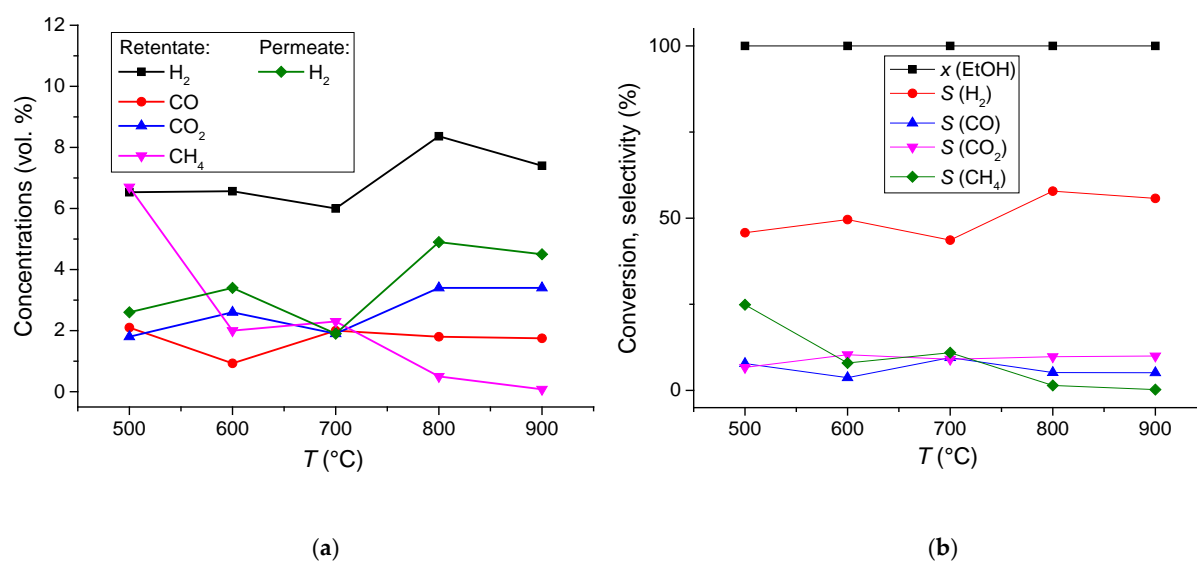

**Figure S2.** Dependencies of ethanol steam reforming products concentrations (a), ethanol conversion and product selectivities (b) on temperature. Steam to ethanol ratio 6, ethanol inlet concentration 6 vol. %.

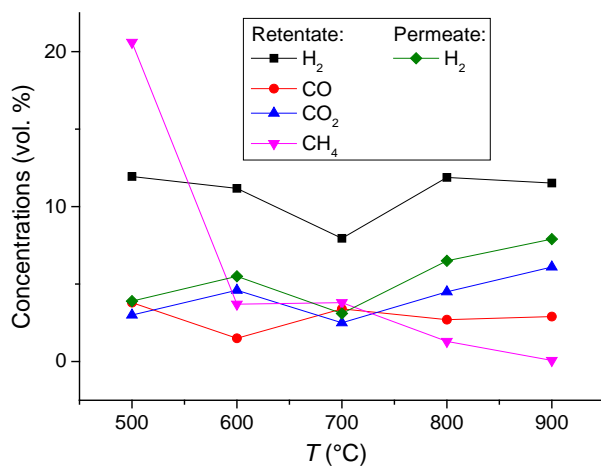

(a)

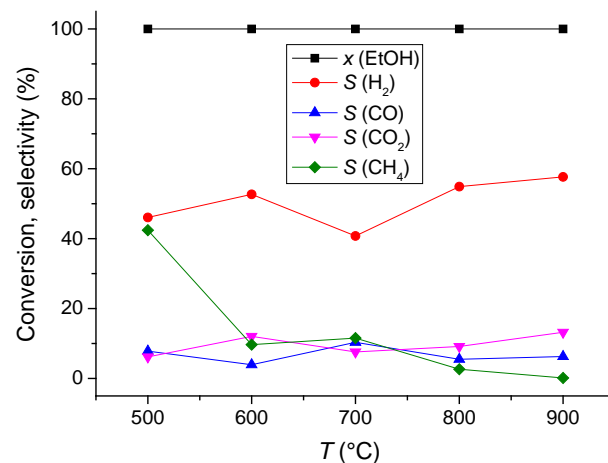

(b)

**Figure S3.** Dependencies of ethanol steam reforming products concentrations (a), ethanol conversion and product selectivities (b) on temperature. Steam to ethanol ratio 6, ethanol inlet concentration 8 vol. %.

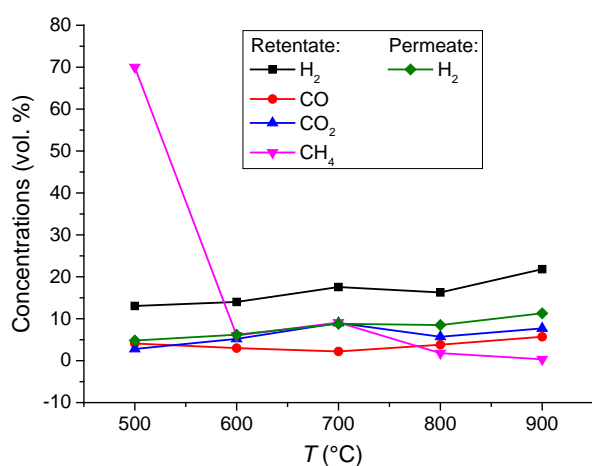

(a)

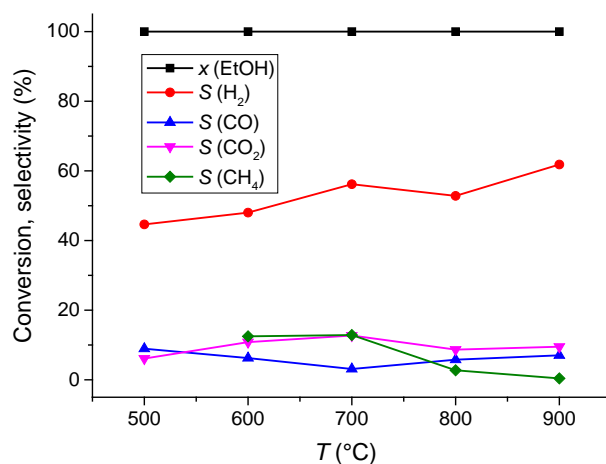

(b)

**Figure S4.** Dependencies of ethanol steam reforming products concentrations (a), ethanol conversion and product selectivities (b) on temperature. Steam to ethanol ratio 6, ethanol inlet concentration 11 vol. %.

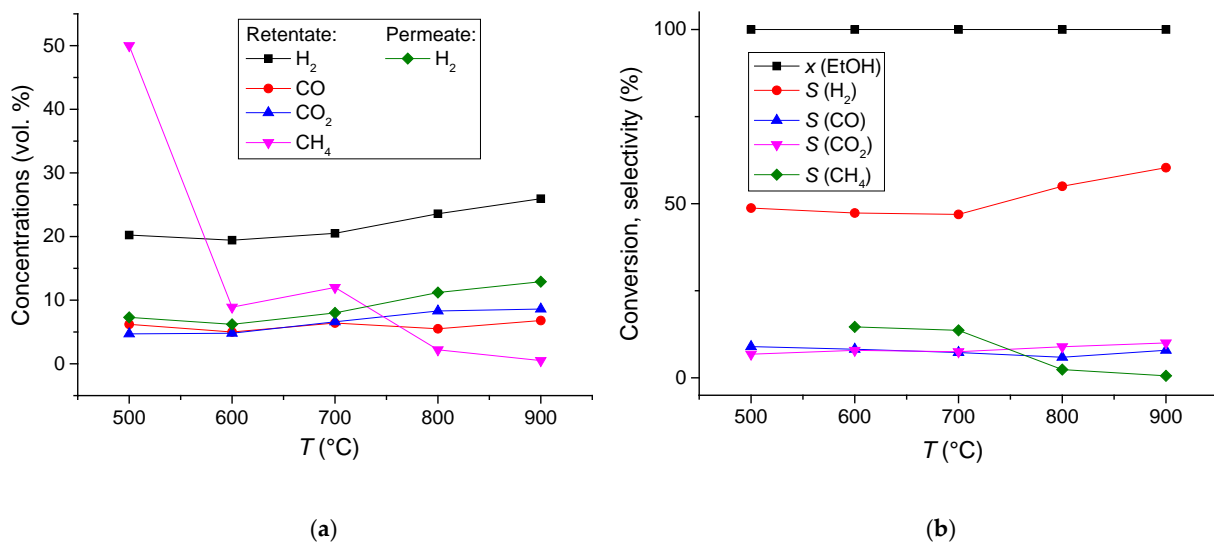

**Figure S5.** Dependencies of ethanol steam reforming products concentrations (a), ethanol conversion and product selectivities (b) on temperature. Steam to ethanol ratio 6, ethanol inlet concentration 14 vol. %.

$S/E = 4$

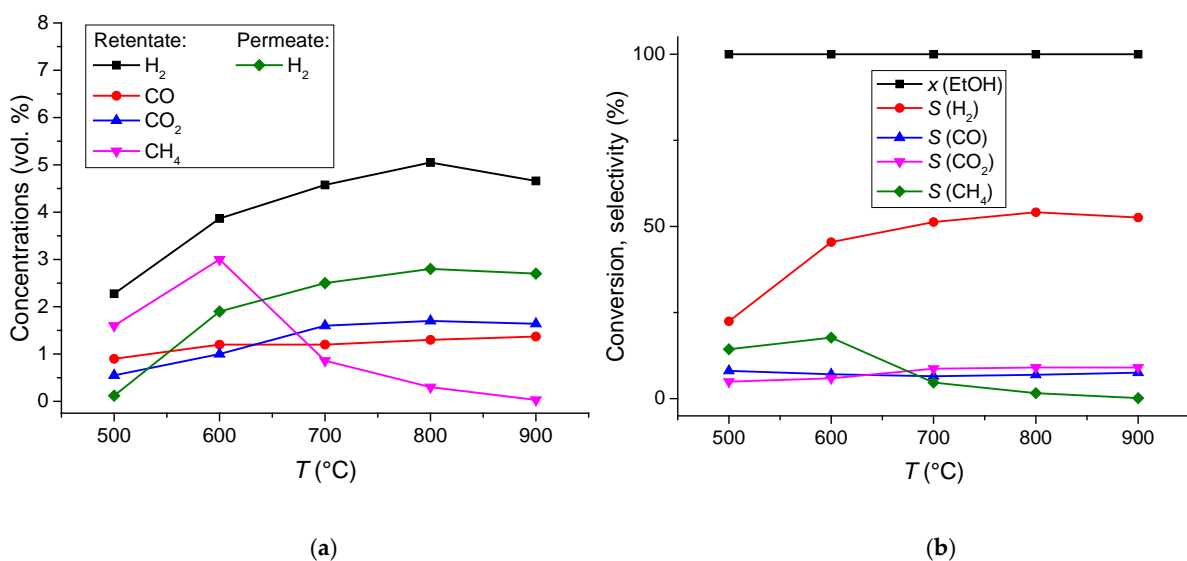

**Figure S6.** Dependencies of ethanol steam reforming products concentrations (a), ethanol conversion and product selectivities (b) on temperature. Steam to ethanol ratio 4, ethanol inlet concentration 4 vol. %.

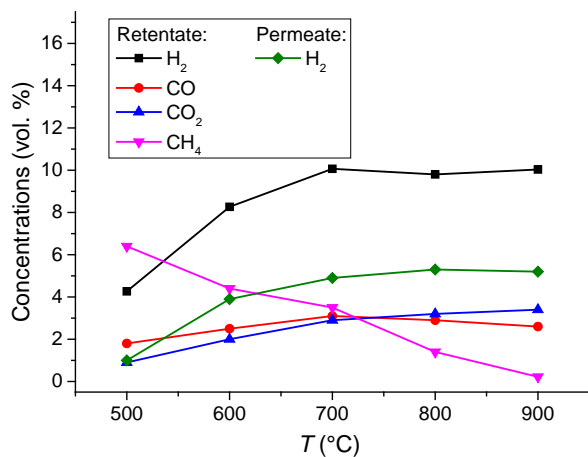

(a)

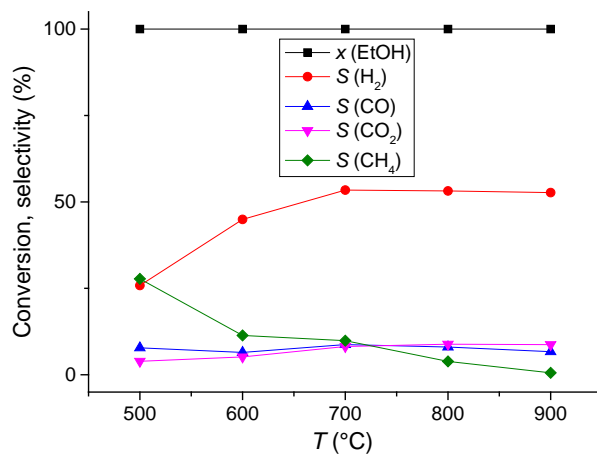

(b)

**Figure S7.** Dependencies of ethanol steam reforming products concentrations (a), ethanol conversion and product selectivities (b) on temperature. Steam to ethanol ratio 4, ethanol inlet concentration 8 vol. %.

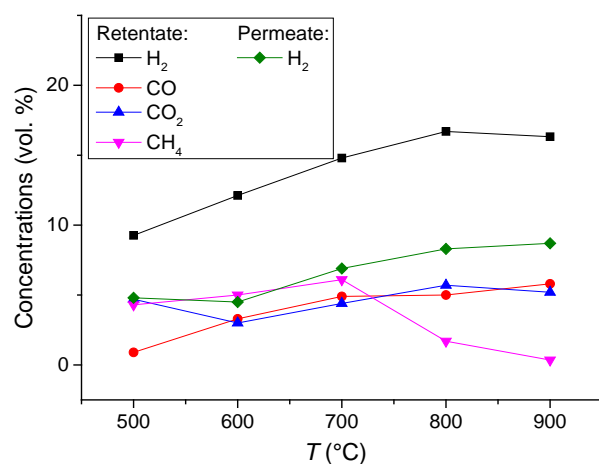

(a)

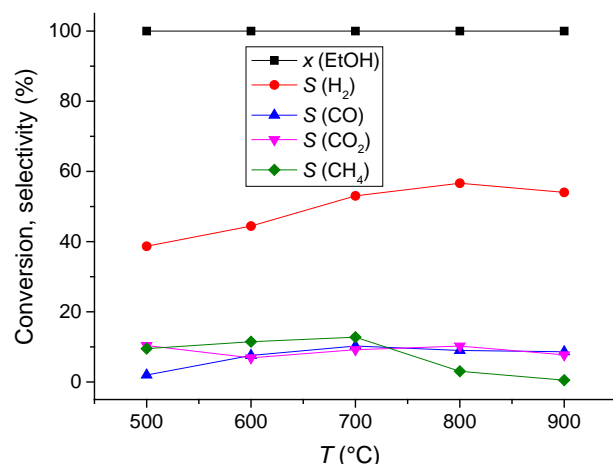

(b)

**Figure S8.** Dependencies of ethanol steam reforming products concentrations (a), ethanol conversion and product selectivities (b) on temperature. Steam to ethanol ratio 4, ethanol inlet concentration 12 vol. %.

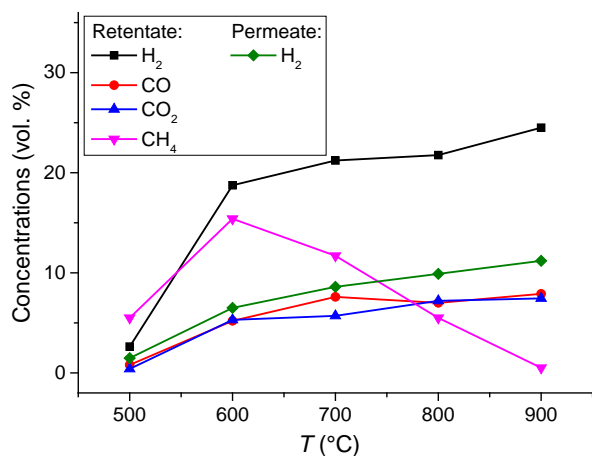

(a)

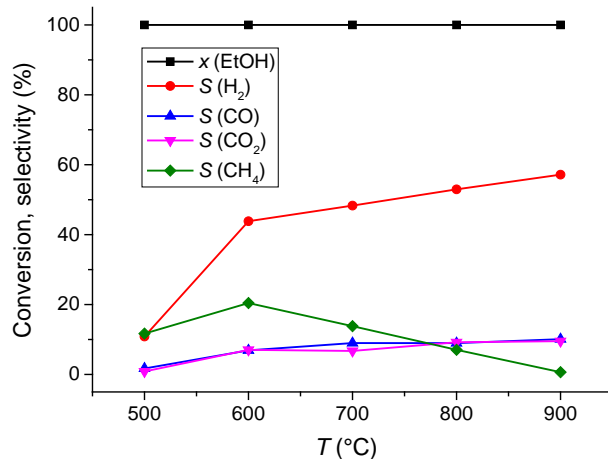

(b)

**Figure S9.** Dependencies of ethanol steam reforming products concentrations (a), ethanol conversion and product selectivities (b) on temperature. Steam to ethanol ratio 4, ethanol inlet concentration 16 vol. %.

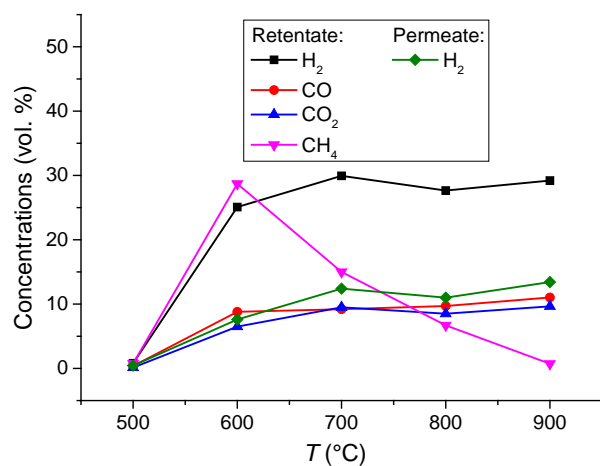

(a)

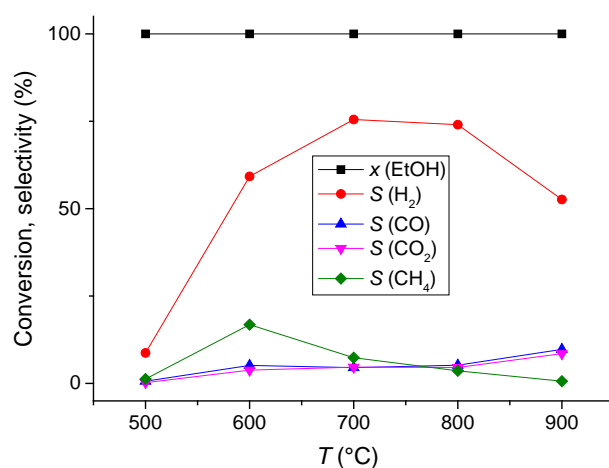

(b)

**Figure S10.** Dependencies of ethanol steam reforming products concentrations (a), ethanol conversion and product selectivities (b) on temperature. Steam to ethanol ratio 4, ethanol inlet concentration 20 vol. %.

$$S/E = 2$$

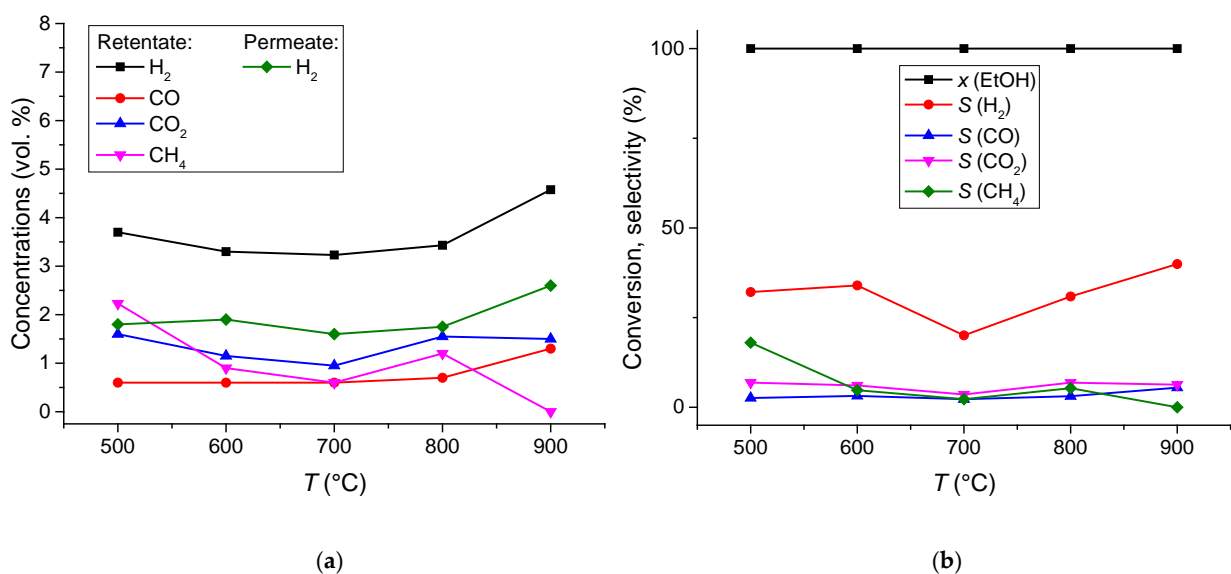

**Figure S11.** Dependencies of ethanol steam reforming products concentrations (a), ethanol conversion and product selectivities (b) on temperature. Steam to ethanol ratio 2, ethanol inlet concentration 6 vol. %.

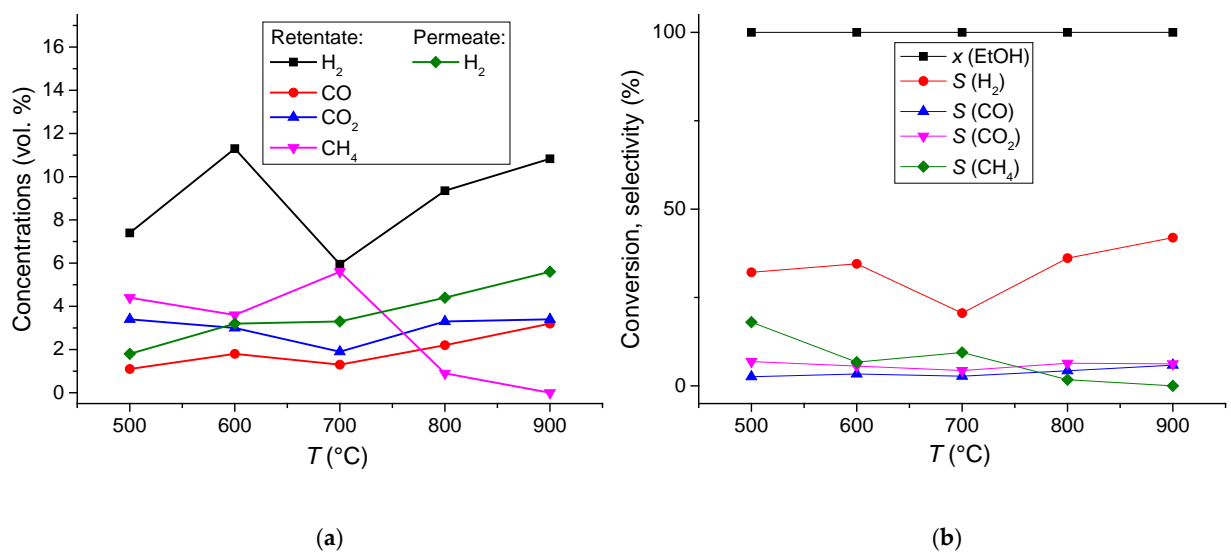

**Figure S12.** Dependencies of ethanol steam reforming products concentrations (a), ethanol conversion and product selectivities (b) on temperature. Steam to ethanol ratio 2, ethanol inlet concentration 13 vol. %.

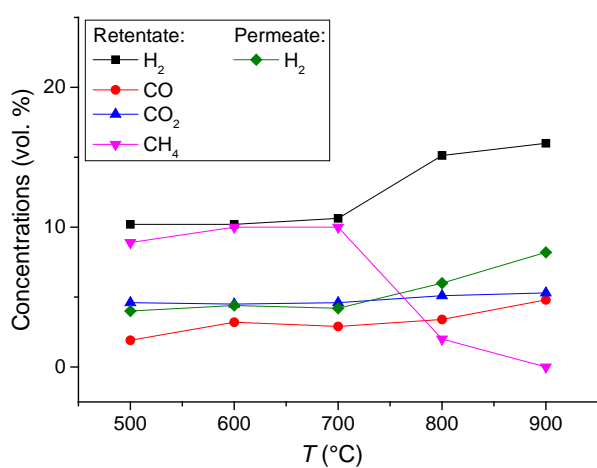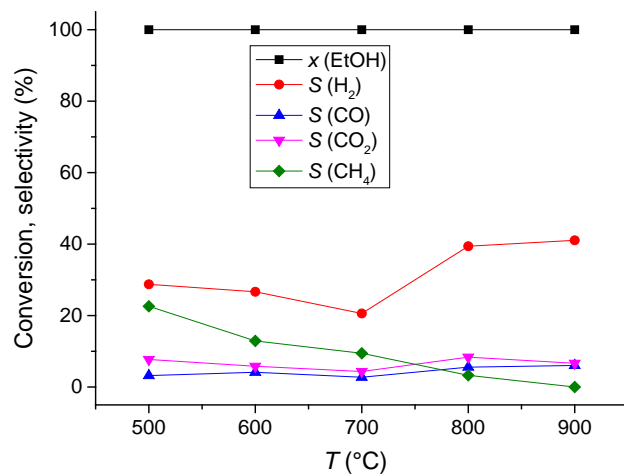

(a)

(b)

**Figure S13.** Dependencies of ethanol steam reforming products concentrations (a), ethanol conversion and product selectivities (b) on temperature. Steam to ethanol ratio 2, ethanol inlet concentration 20 vol. %.

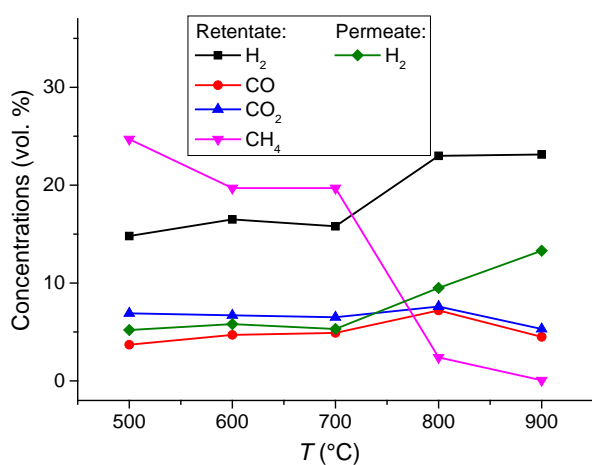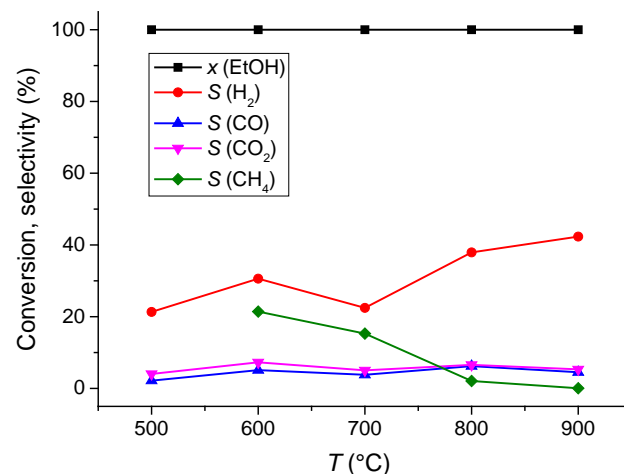

(a)

(b)

**Figure S14.** Dependencies of ethanol steam reforming products concentrations (a), ethanol conversion and product selectivities (b) on temperature. Steam to ethanol ratio 2, ethanol inlet concentration 27 vol. %.

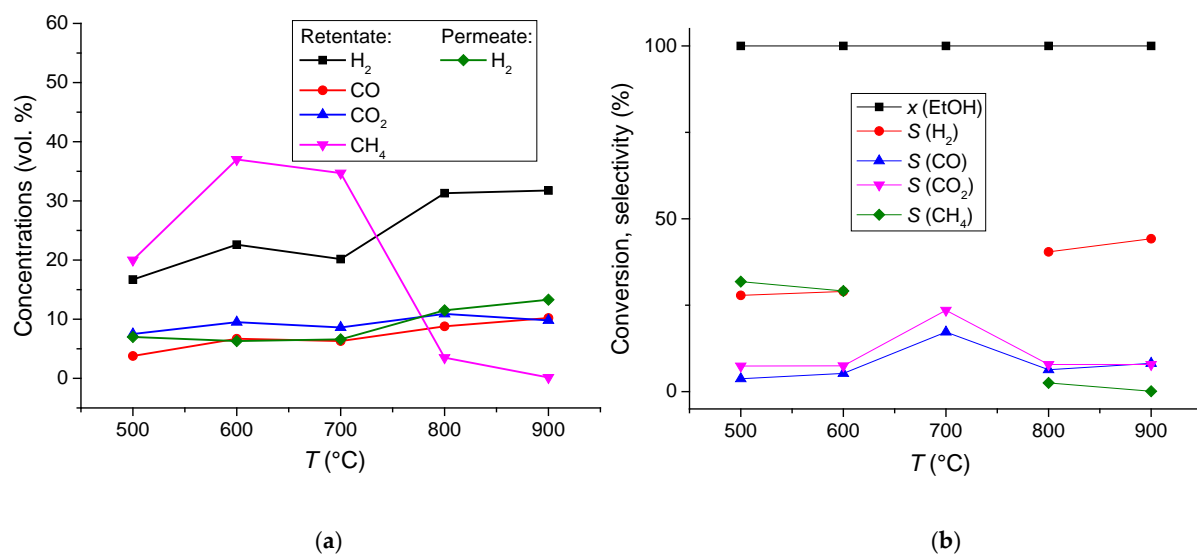

**Figure S15.** Dependencies of ethanol steam reforming products concentrations (a), ethanol conversion and product selectivities (b) on temperature. Steam to ethanol ratio 2, ethanol inlet concentration 33 vol. %.
